# Supplementary material for: Design Process and Implementation of Teacher Training Modules in Movement Integration: What Have We Learnt?
Source: MDPI journal article supplement (doi:10.3390/su14095484), 2022-05-03
Supplement: s1 [file s1]

Archive with 4 entries (4 files):
- File S1.pdf
- File S2.pdf
- File S3.pdf
- File S4.pdf
