# Supplementary material for: Design Process and Implementation of Teacher Training Modules in Movement Integration: What Have We Learnt?
Source: MDPI journal article supplement (doi:10.3390/su14095484), 2022-05-03
Supplement: s1 [file s1 › File S3.pdf]

File S3. Movement integration timetable poster.

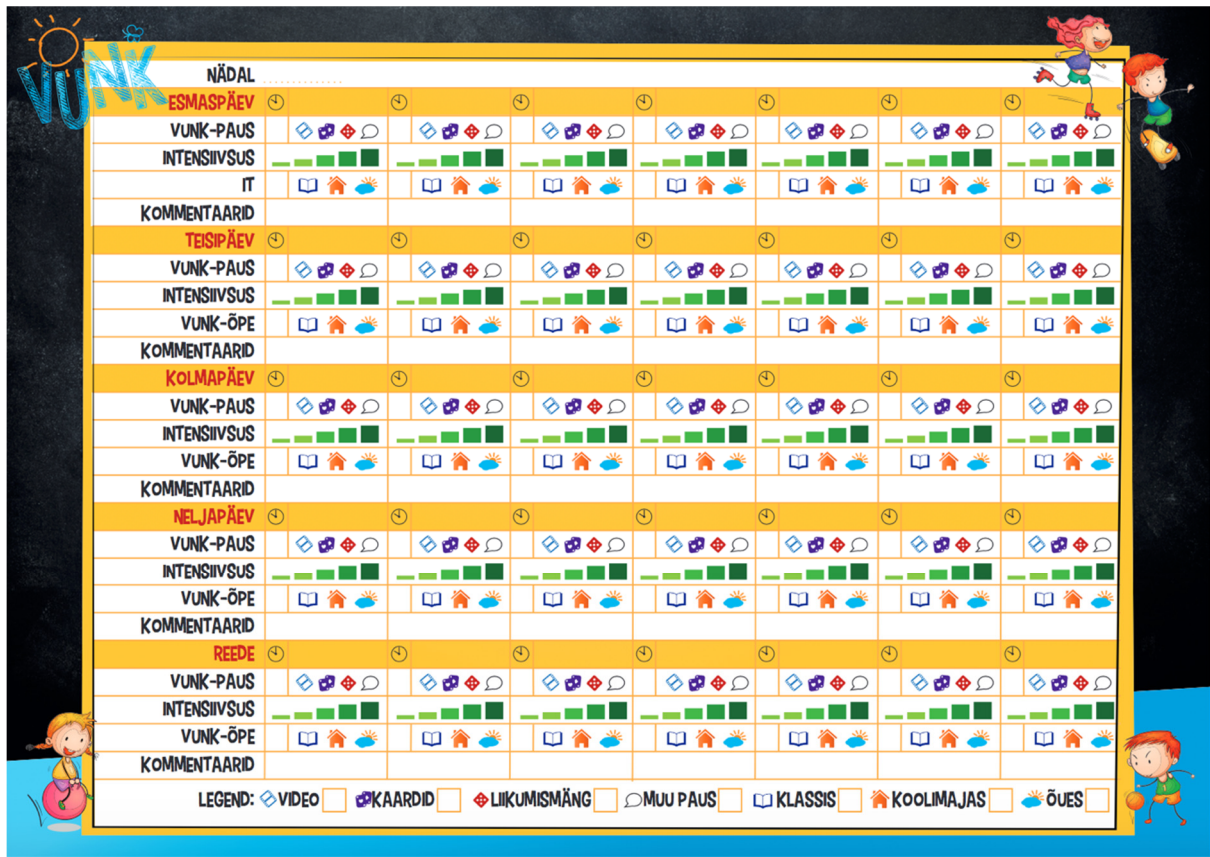

| NÄDAL        | ESMASPÄEV                          | TEISIPÄEV                          | KOLMAPÄEV                          | NELJAPÄEV                          | REEDE                              | LAUPÄEV                            | PÜHAPÄEV                           |
|--------------|------------------------------------|------------------------------------|------------------------------------|------------------------------------|------------------------------------|------------------------------------|------------------------------------|
| VUNK-PAUS    | VIDEO KAARDID LIKUMISMÄNG MUU PAUS |
| INTENSIIVSUS | KLASSIS KOOLIMAJAS ÕUES            |
| VUNK-ÕPE     | KLASSIS KOOLIMAJAS ÕUES            |
| KOMMENTAARID |                                    |                                    |                                    |                                    |                                    |                                    |                                    |

LEGEND: VIDEO KAARDID LIKUMISMÄNG MUU PAUS KLASSIS KOOLIMAJAS ÕUES
