# Supplementary material for: Design Process and Implementation of Teacher Training Modules in Movement Integration: What Have We Learnt?
Source: MDPI journal article supplement (doi:10.3390/su14095484), 2022-05-03

#### File S4. "Idea board" for individual feedback at the end of the seminars.

The following questions were asked at the end of every seminar:

1. *What was valuable in today's seminar?*
2. *What should be changed in the seminar?*
3. *Which of the activities you practiced today will you definitely use for MI in your lessons?*
4. *Describe your expectations for the next seminar.*

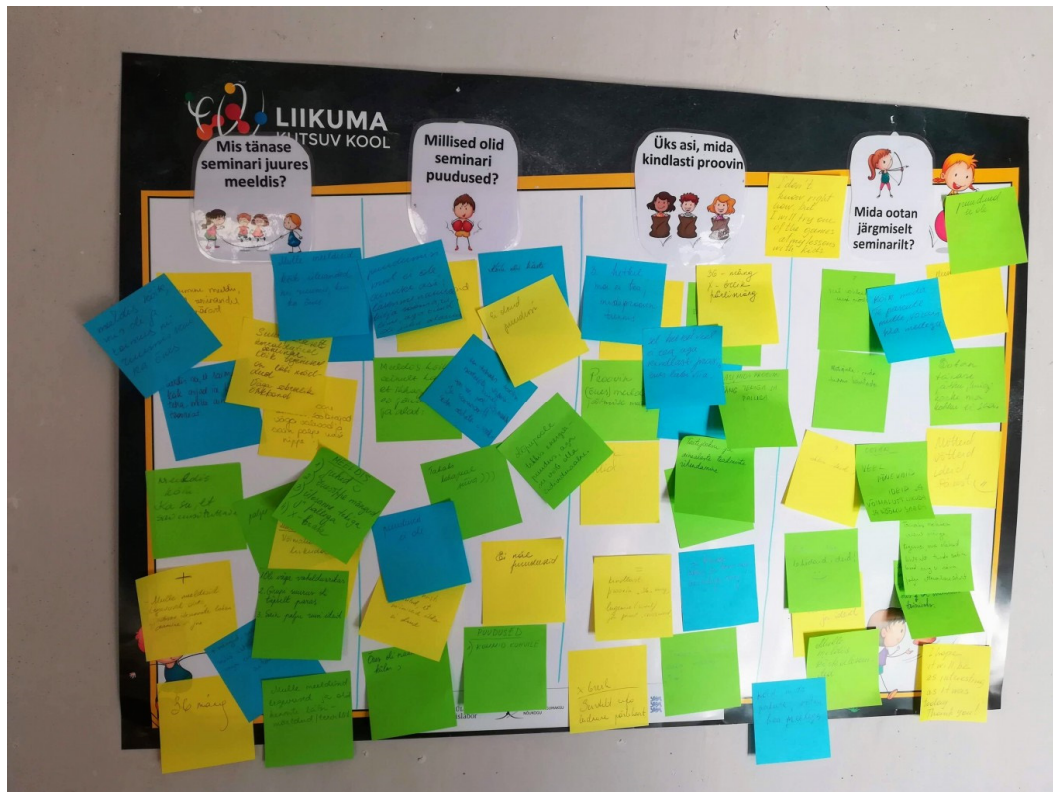

Supplement: s1 [file s1 › File S4.pdf]
